# Supplementary material for: Source-resolved volatility and oxidation state decoupling in wintertime organic aerosols in Seoul
Source: Copernicus journal article supplement (doi:10.5194/acp-26-1145-2026), 2026-01-23
Supplement: Supplementary file 1 [file acp-26-1145-2026-supplement.pdf]

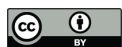

*Supplement of*

## **Source-resolved volatility and oxidation state decoupling in wintertime organic aerosols in Seoul**

**Hwajin Kim et al.**

*Correspondence to:* Hwajin Kim (khj0116@snu.ac.kr)

The copyright of individual parts of the supplement might differ from the article licence.

1  
2  
3  
4  
  
  
  
  
  
  
  
  
  
5  
6

**Table S1.** Vaporization enthalpy ( $\Delta H_{\text{exp}}$ ) and mass accommodation coefficient ( $\alpha_m$ ) values of each factor resolved by PMF.

| PMF factor | Vaporization enthalpy<br>( $\Delta H_{\text{exp}}$ , kJ mol <sup>-1</sup> )<br>( $40 \leq \Delta H_{\text{exp}} \leq 200$ ) | Mass accommodation coefficient ( $\alpha_m$ )<br>( $0.1 \leq \alpha_m \leq 1$ ) |
|------------|-----------------------------------------------------------------------------------------------------------------------------|---------------------------------------------------------------------------------|
| HOA        | 165.86                                                                                                                      | 0.81                                                                            |
| COA        | 161.65                                                                                                                      | 0.79                                                                            |
| NOA        | 167.08                                                                                                                      | 0.82                                                                            |
| BBOA       | 163.84                                                                                                                      | 0.80                                                                            |
| LO-OOA     | 151.57                                                                                                                      | 0.80                                                                            |
| MO-OOA     | 165.00                                                                                                                      | 0.79                                                                            |

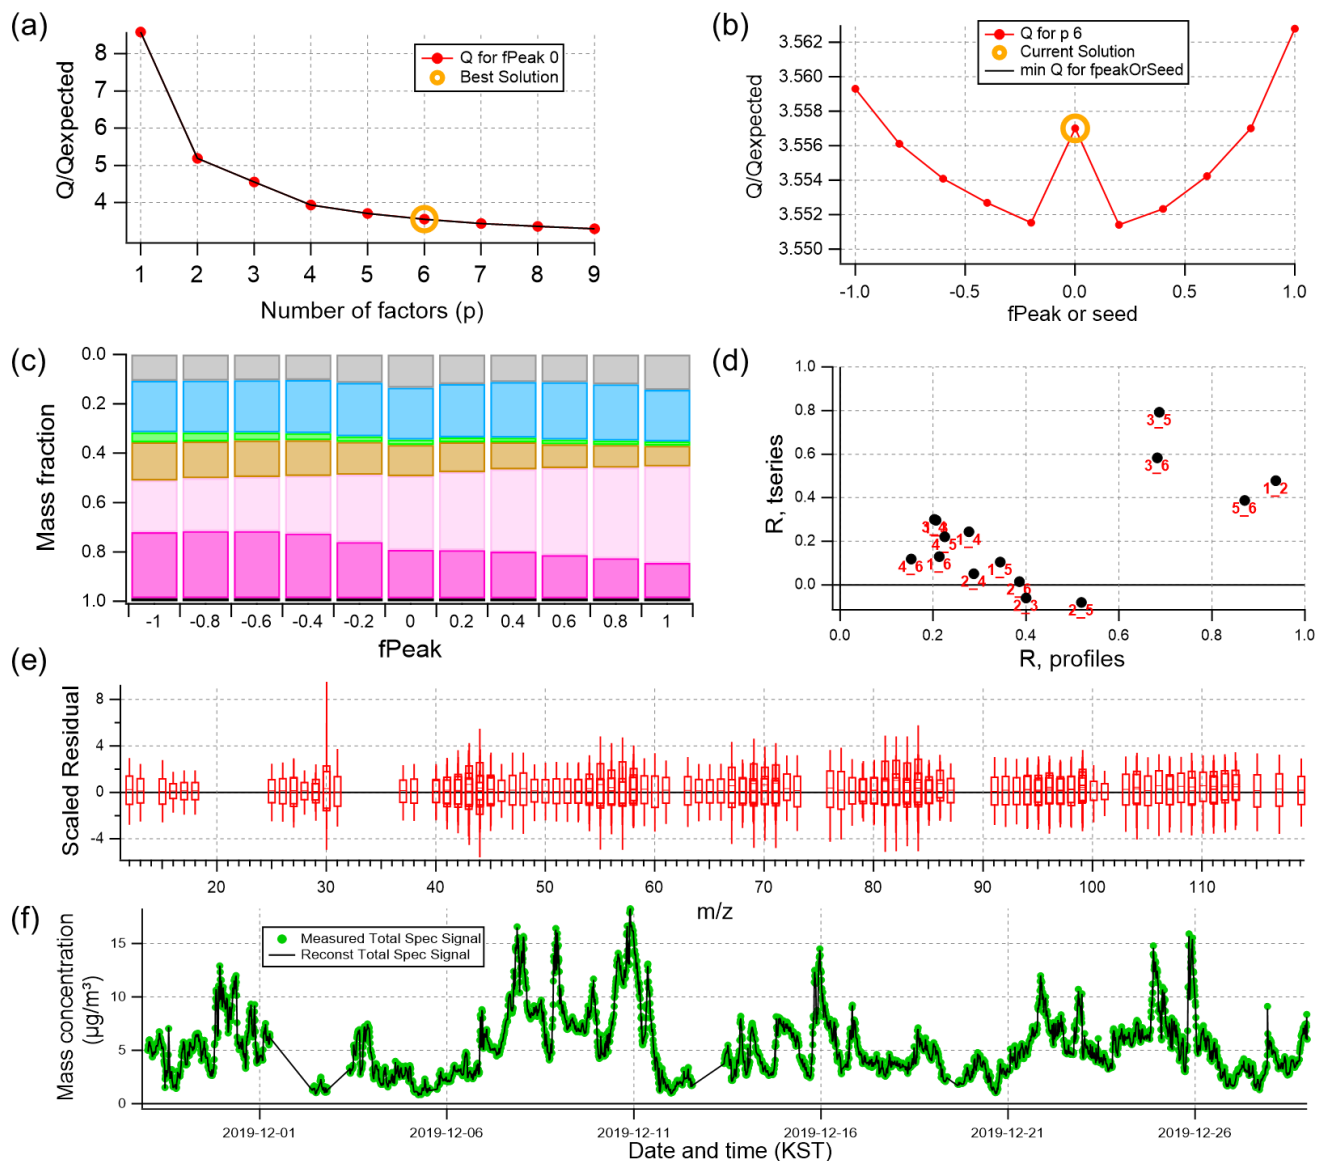

9 **Figure S1.** Key diagnostic plots for the six-factor solution resolved by PMF analysis: (a)  $Q/Q_{exp}$  against the number of factors  
 10 ( $p$ ), (b)  $Q/Q_{exp}$  as a function of  $fPeak$ , (c) mass fractional contribution of each PMF factor to the total mass, (d) Pearson's  $r$   
 11 correlation coefficients for correlations among the time series and mass spectra of factors, (e) box and whiskers plot showing  
 12 the distributions of the scaled residuals for each  $m/z$ , (f) time series of the measured mass and the reconstructed mass from the  
 13 sum of the 6 factors.

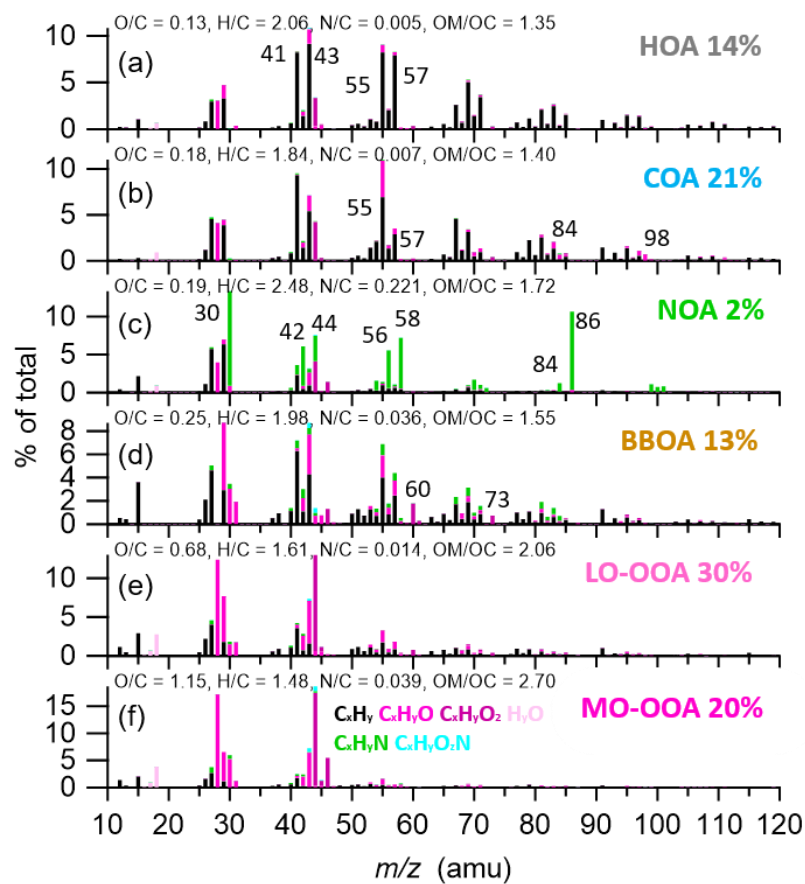

15 **Figure S2.** High-resolution mass spectra of (a) HOA, (b) COA, (c) NOA, (d) BBOA, (e) LO-OOA, and MO-OOA resolved  
16 by PMF analysis.

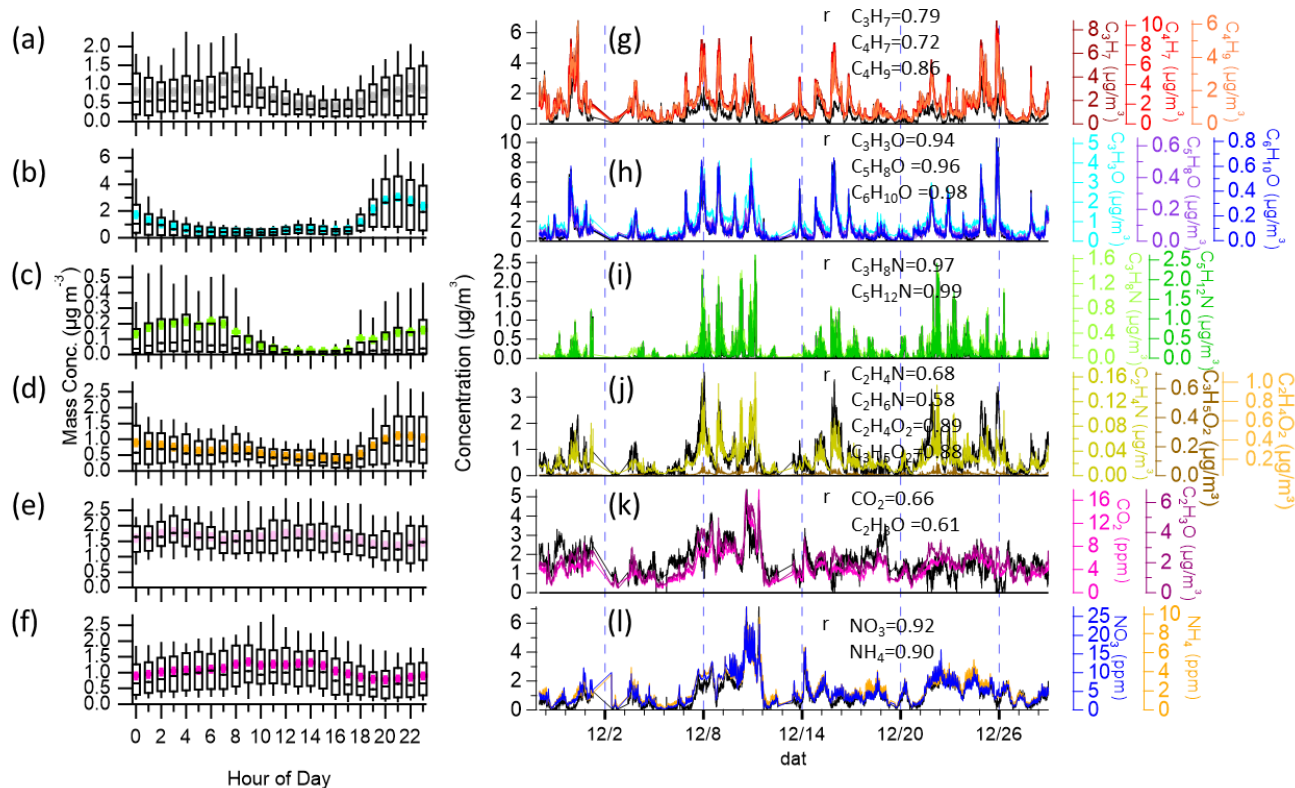

17

18 **Figure S3.** Diurnal variations of (a) HOA, (b) COA, (c) NOA, (d) BBOA, (e) LO-OOA, and (f) MO-OOA resolved by PMF  
 19 analysis. Comparison of time series and correlations between OA factors (g) HOA, (h) COA, (i) NOA, (j) BBOA, (k) LO-  
 20 OOA, and (l) MO-OOA and their tracers.

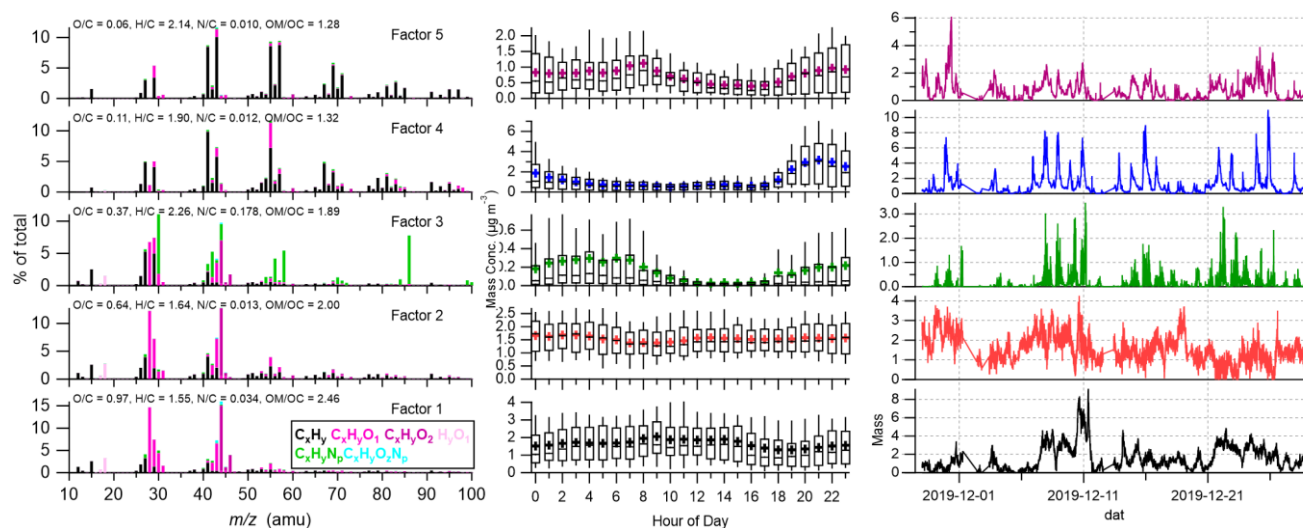

**Figure S4.** 5-factors result from PMF analysis. The five factors from 1 to 5 are HOA, COA, NOA, LO-OOA, and MO-OOA, respectively.

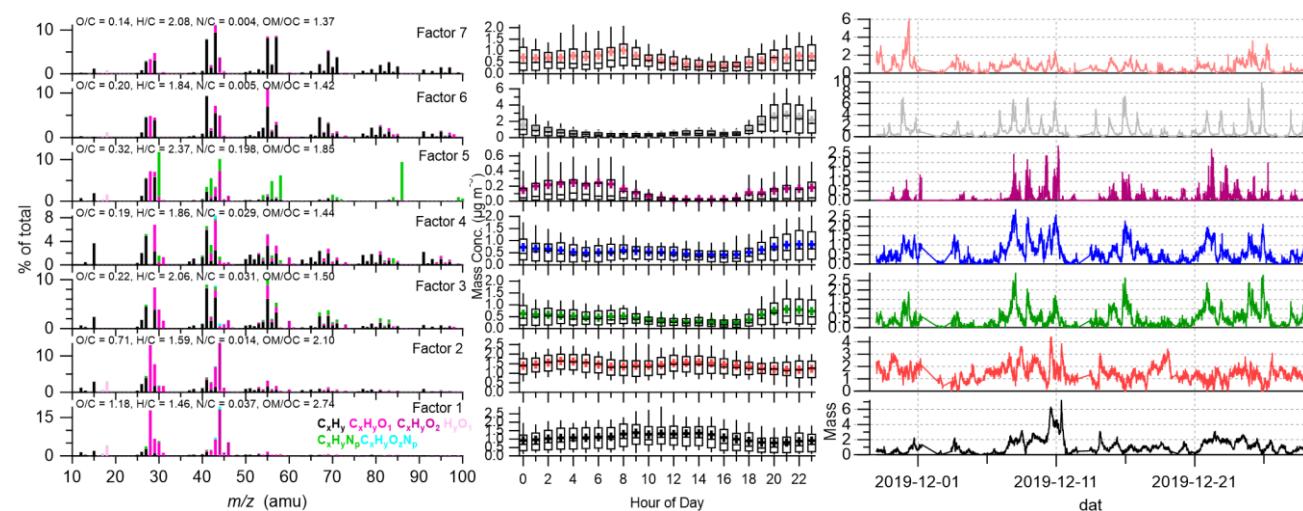

**Figure S5.** 7-factors result from PMF analysis. The five factors from 1 to 7 are HOA, COA, NOA, BBOA1, BBOA2, LO-OOA and MO-OOA, respectively.

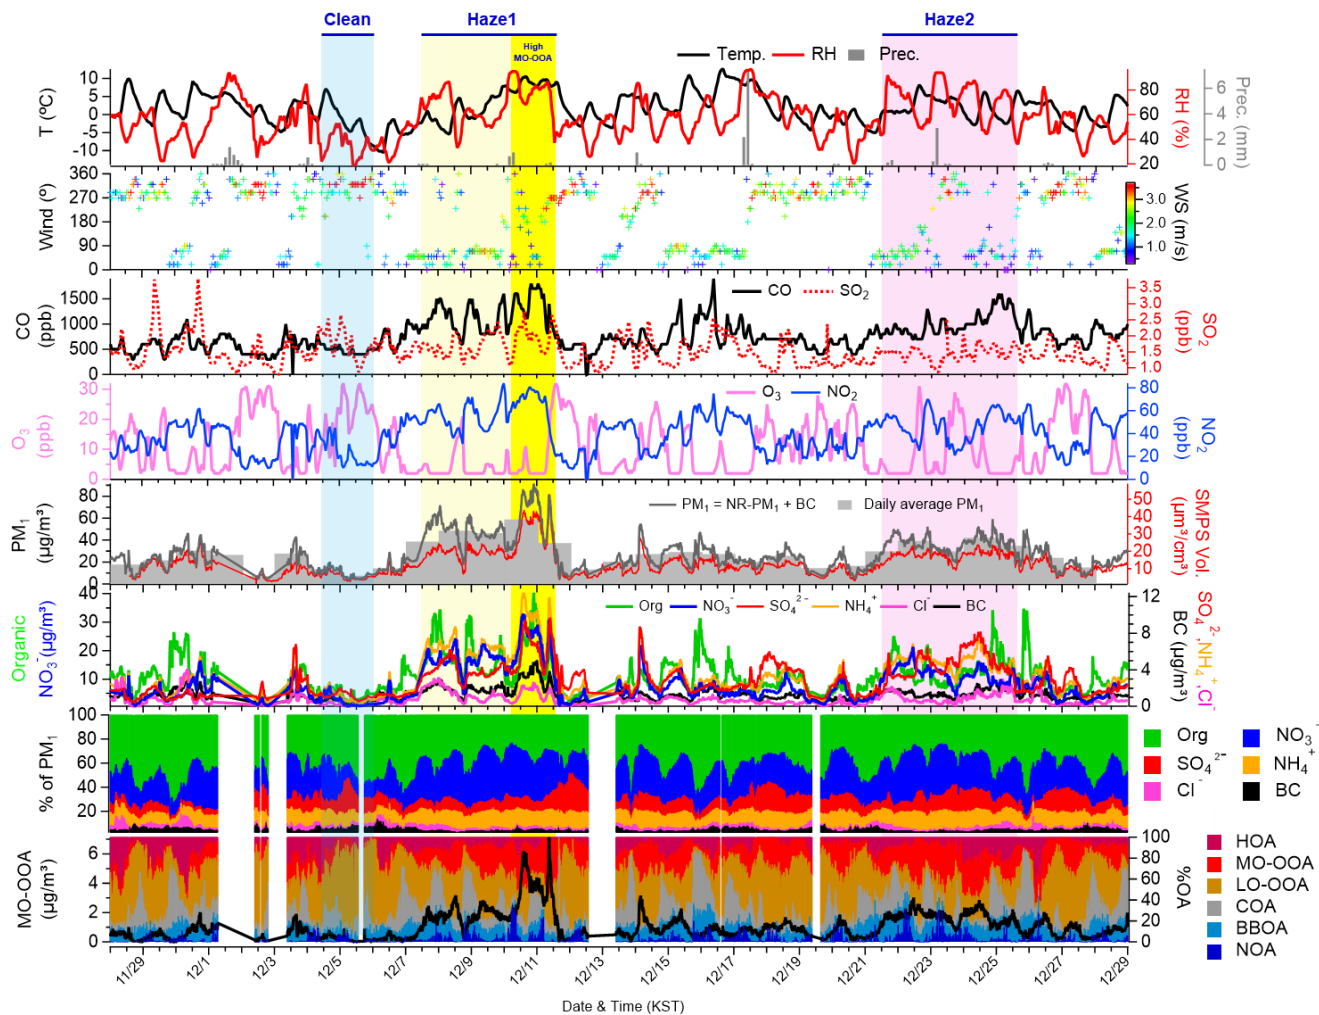

**Figure S6.** Summary of temporal variations of meteorological variables (Temperature, RH, precipitation, wind direction, and wind speed), gaseous pollutants (CO, SO<sub>2</sub>, O<sub>3</sub>, and NO<sub>2</sub>), PM<sub>1</sub>, volume concentration from SMPS, NR-species with BC, mass fractional contribution of NR-species with BC and OA, and concentration of MO-OOA. Blue shade indicates a clean period, whereas yellow and pink shades indicate haze periods. The high MO-OOA period is shaded in bright yellow.

37

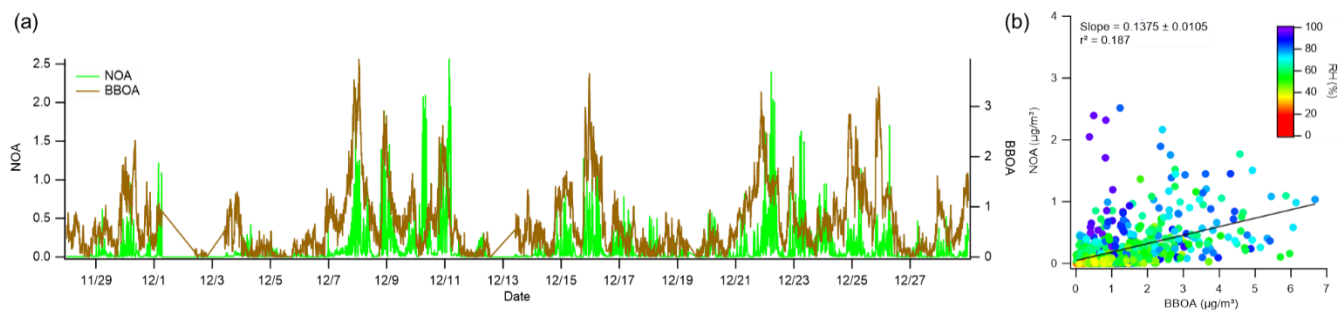38 **Figure S7.** (a) Time series of NOA and BBOA. (b) Scatter plot showing the correlation and slope between NOA and BBOA.



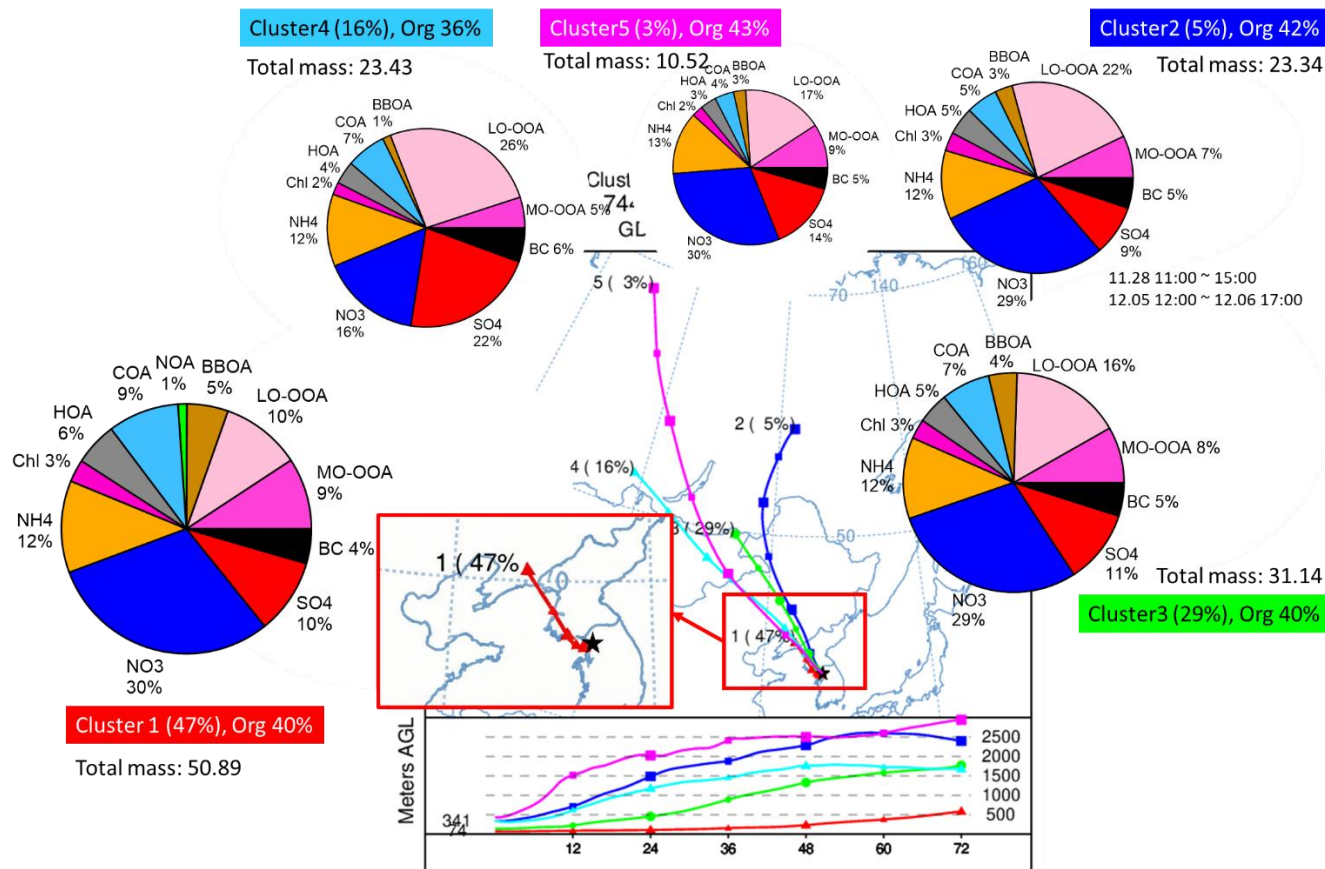

39

40 **Figure S8.** Back trajectories spanning 96 hours were computed hourly using the Hybrid Single-Particle Lagrangian Integrated  
 41 Trajectory (HYSPLIT; ver 5.0.0b). These trajectories originated from release points set at half of the mixing height at the KIST  
 42 location (latitude: 37.60° N, longitude: 127.05° E), and on average, the trajectories arrived at an altitude of approximately 191  
 43 m (Kim et al., 2017). To discern pollutant properties associated with distinct transport patterns, cluster analysis was conducted  
 44 on the trajectories using HYSPLIT4 software. Five clusters of trajectories were identified based on their spatial distribution  
 45 similarities. Five clustered back trajectories; Cluster 1 (47%, total mass: 50.89  $\mu\text{g m}^{-3}$ ) from the local area, cluster 2 (5%, total  
 46 mass: 23.34  $\mu\text{g m}^{-3}$ ) from northeast, cluster 3 & 4 (29%, total mass: 31.14  $\mu\text{g m}^{-3}$  & 16%, 23.34  $\mu\text{g m}^{-3}$ ) passed through  
 47 Mongolia and China, and cluster 5 (3%, total mass: 10.52  $\mu\text{g m}^{-3}$ ) long-range transfer started from Russia.

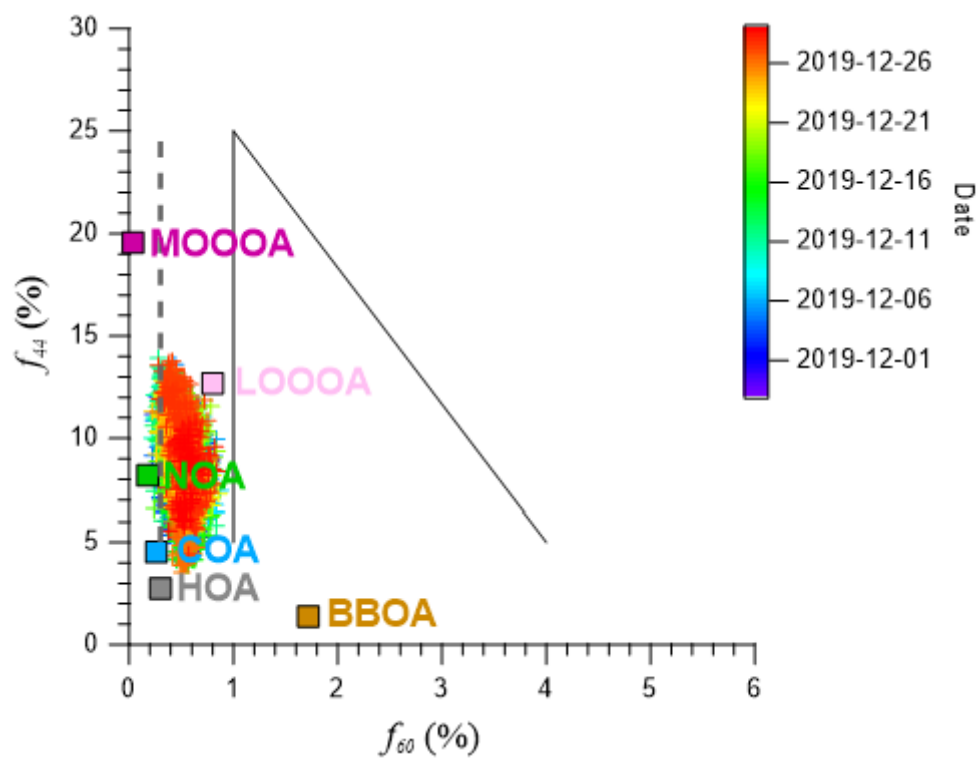

48

49

50 **Figure S9.** Scatterplots of  $f_{44}$  ( $\text{CO}_2^+$ ) vs  $f_{60}$  ( $\text{C}_2\text{H}_4\text{O}_2^+$ )

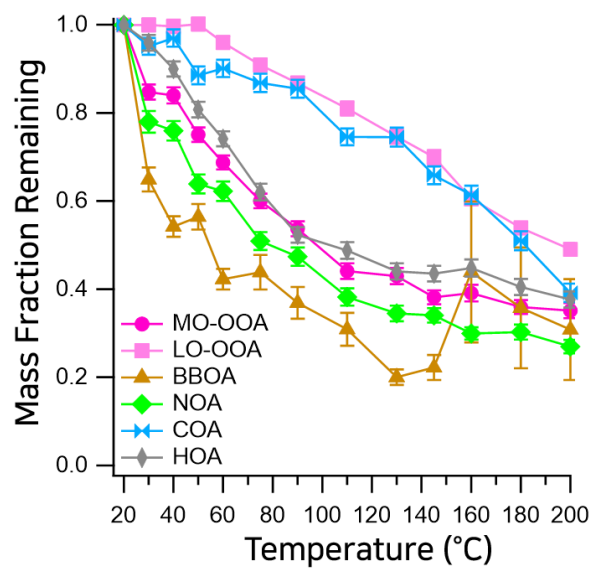

52 **Figure S10.** Mass fraction remaining (MFR) of 6 different OA factors resolved by PMF analysis.

53

54

55

56

57

58

59

60

61

62

63

64

65

66

67

68

69

70

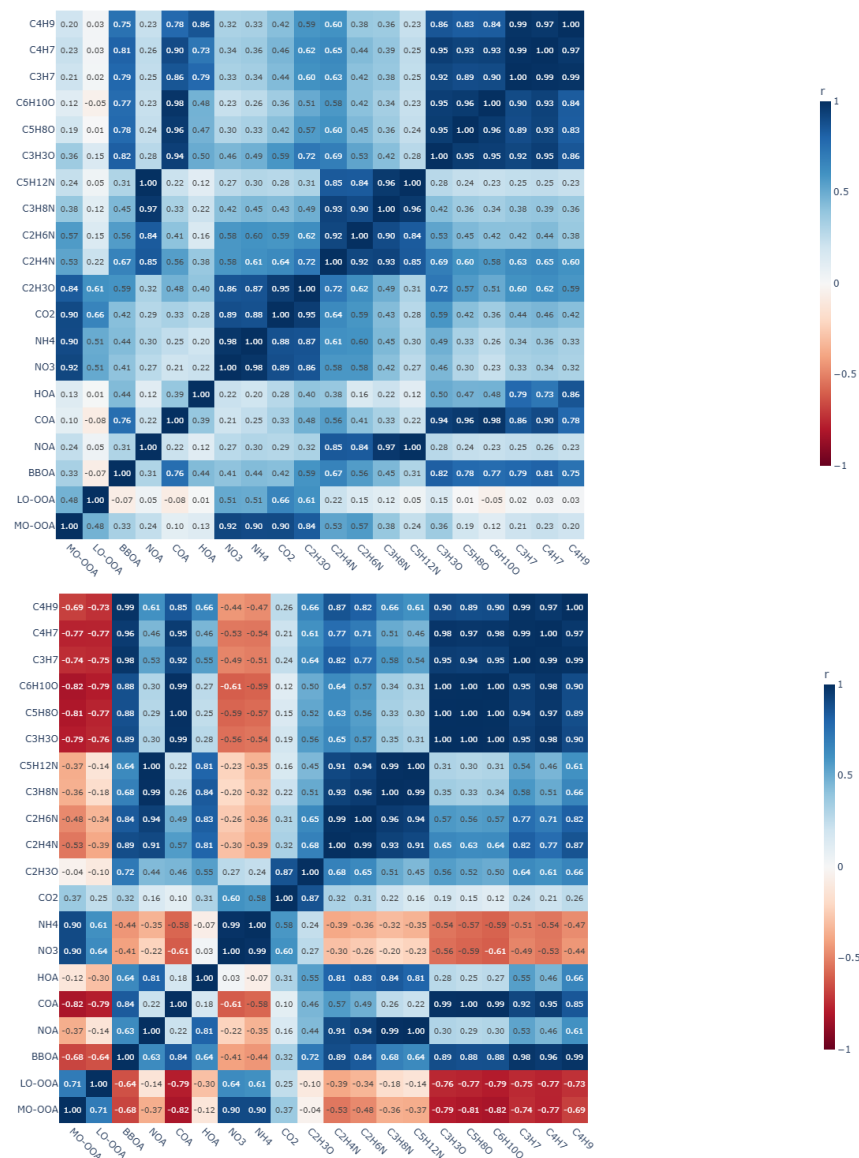

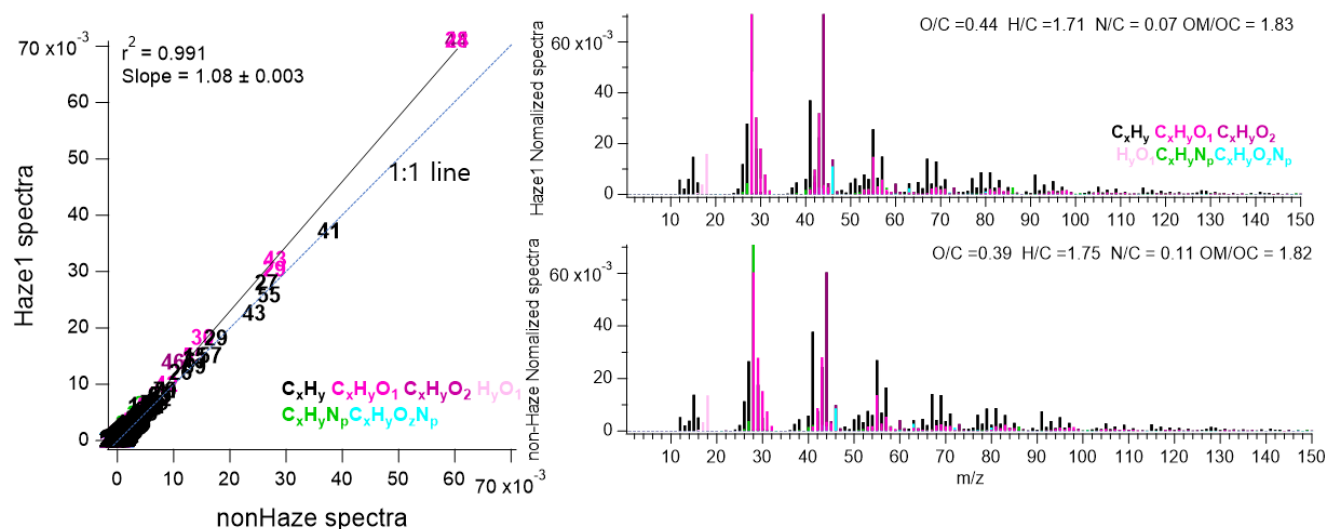

**Figure S12.** Comparison of organic-aerosol (OA) mass spectra between a haze event and its paired non-haze reference. Left: Scatter plot of ion intensities (normalized to OA) for Haze1 vs. non-haze with a 1:1 line (blue). The regression shows strong overall agreement ( $r^2 = 0.991$ ; slope =  $1.08 \pm 0.003$ ), with systematic enrichments during haze at oxygenated fragments ( $m/z$  28 =  $\text{CO}^+$ , 29 =  $\text{CHO}^+$ , 44 =  $\text{CO}_2^+$ ) and a modest relative decrease at hydrocarbon fragments ( $m/z$  41, 43, 55, 57). Right, top: Haze-1 average spectrum; Right, bottom: non-haze average spectrum.

**Table S2.** Uncertainty in factor concentration for the 5 to 7-factor solution from 100 iterations bootstrap.

|                   | Factor 1          | Factor 2          | Factor 3        | Factor 4       | Factor 5       | Factor 6       | Factor 7 |
|-------------------|-------------------|-------------------|-----------------|----------------|----------------|----------------|----------|
| 5-factor solution | 4.73%             | 6.46%             | 5.95%           | 5.78%          | 2.59%-         | -              | -        |
| 6-factor solution | 4.26%<br>(MO-OOA) | 5.23%<br>(LO-OOA) | 9.36%<br>(BBOA) | 6.48%<br>(NOA) | 5.24%<br>(COA) | 5.80%<br>(HOA) | -        |
| 7-factor solution | 5.45%             | 4.97%             | 13.32%          | 7.09%          | 11.94%         | 4.85%          | 6.90%    |

To ensure the robustness of the 6-factor solution, we calculated uncertainties for each PMF factor using the bootstrap method (100 iterations) with the PET toolkit (v2.05) (EPA, 2014; Xu et al., 2018; Srivastava et al., 2021).

102 This method generates a time series distribution for each factor, providing an average concentration and standard  
103 deviation; the uncertainty is defined as the standard deviation divided by the average concentration.  
104  
105 As shown in Table S2, the 5-factor solution exhibited the lowest average uncertainty (5.10%). While  
106 mathematically stable, this low uncertainty is typical of under-resolved solutions where distinct sources are merged.  
107 In the 6-factor solution, the average uncertainty increased slightly to 6.06%, with individual factors ranging from  
108 4.26% (MO-OOA) to 9.36% (BBOA). Despite this marginal increase, all factors in the 6-factor solution remained  
109 well within the acceptable range ( $<10\%$ ), confirming that the separation of the additional source did not  
110 compromise the solution's statistical stability.  
111  
112 In contrast, the 7-factor solution showed signs of instability, with the average uncertainty rising to 7.79% and  
113 specific factors exceeding 10% (e.g., Factor 3 at 13.32% and Factor 5 at 11.94%). This degradation suggests the  
114 splitting of a factor into non-robust artifacts. Therefore, the 6-factor solution was selected as the optimal choice,  
115 offering the best balance of chemical resolution and statistical robustness. The average concentration and  $1\sigma$   
116 variability for the chosen 6-factor solution are presented in Figure S13

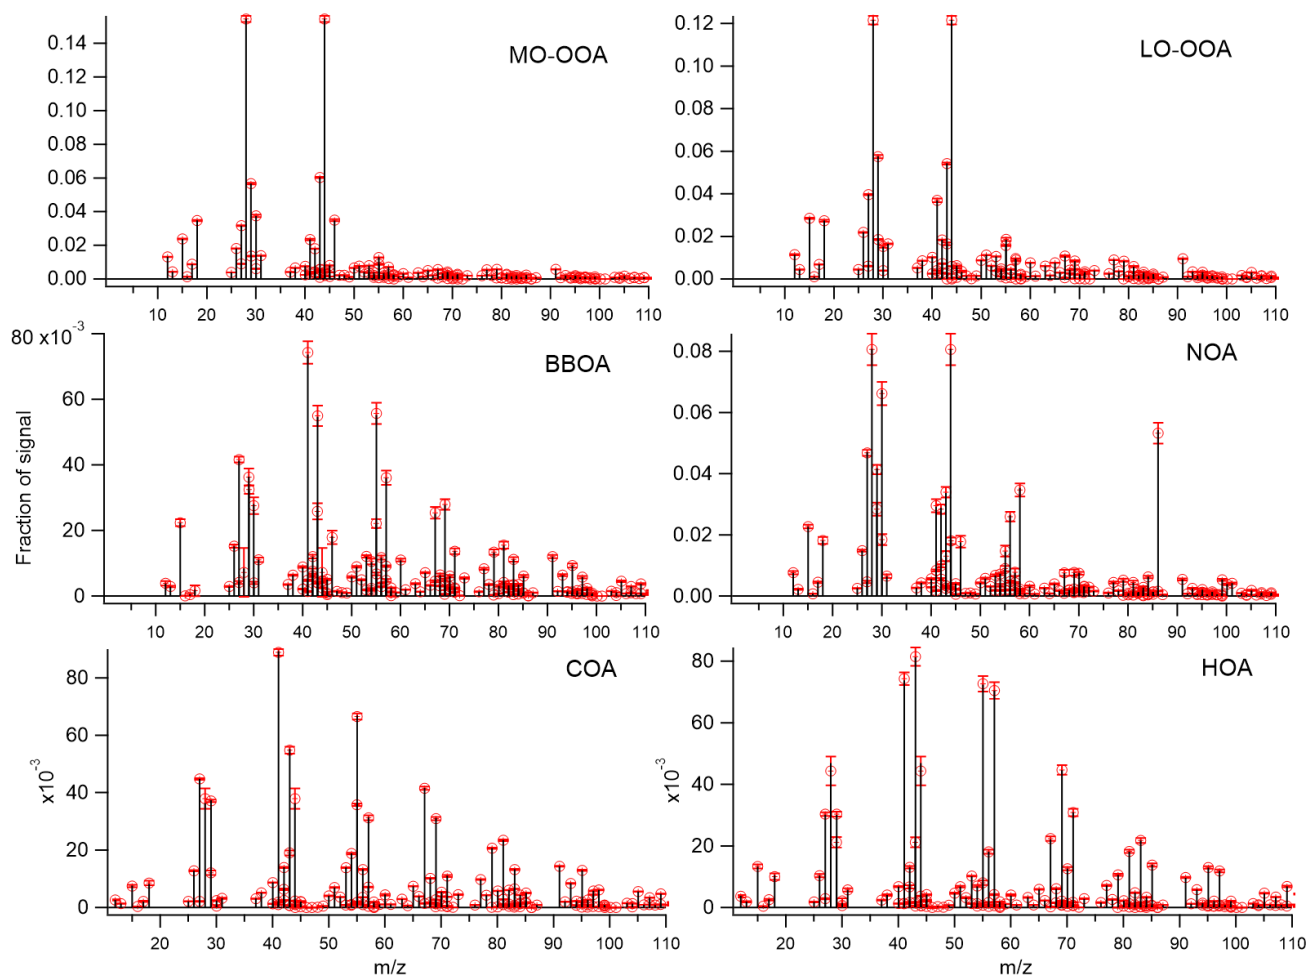

108 **Figure S13.** Bootstrapping analysis of the 6-factor solution (average factor with  $1\sigma$  variation for each point)

109 **References**

- 110 Kim, H., Zhang, Q., Bae, G.-N., Kim, J.Y., Lee, S.B., 2017. Sources and atmospheric processing of winter aerosols in Seoul,  
111 Korea: Insights from real-time measurements using a high-resolution aerosol mass spectrometer. *Atmos. Chem. Phys.* 17,  
112 2009–2033. <https://doi.org/10.5194/acp-17-2009-2017>
- 113 EPA: EPA Positive Matrix Factorization (PMF) 5.0 Fundamentals and User Guide, U.S. Environmental Protection Agency,  
114 2014. [https://www.epa.gov/sites/default/files/2015-02/documents/pmf\\_5.0\\_user\\_guide.pdf](https://www.epa.gov/sites/default/files/2015-02/documents/pmf_5.0_user_guide.pdf)
- 115 Waked, A., Favez, O., Alleman, L.Y., Piot, C., Petit, J.E., Delaunay, T., Verlinden, E., Jayne, J., Sciare, J., 2014. Source  
116 apportionment of PM10 in a north-western Europe regional urban background site (Lens, France) using positive matrix  
117 factorization and including primary emissions. *Atmos. Chem. Phys.* 14, 3325–3346. [https://doi.org/10.5194/acp-14-3325-](https://doi.org/10.5194/acp-14-3325-2014)  
118 [2014](https://doi.org/10.5194/acp-14-3325-2014)
- 119 Soleimani, M., Ebrahimi, Z., Mirghaffari, N., Naseri, M., 2022. Source identification of polycyclic aromatic hydrocarbons  
120 associated with fine particulate matters (PM2.5) in Isfahan City, Iran, using diagnostic ratio and PMF model. *Environ.*  
121 *Sci. Pollut. Res.* 29, 30310–30326. <https://doi.org/10.1007/s11356-021-17635-8>  
122  
123
